# Supplementary material
Source: Springer Nature journal article supplement (https://www.springermedizin.de/resource/supplementary/12913_2007_588_MOESM1_ESM.pdf/9535508)
Supplement: MOESM1 [file 9535508]

Intervention sites (n = 10)

Site excluded  
(n = 1)

No data collected  
(n = 5)

PAS data  
submitted (n = 1)

Intervention sites with routinely  
collected data (n = 3)

**Types of data submitted:**

- Number of referrals (n = 0)
- Activity (n = 2)
- Waiting list data (n = 2)
- Number of lost slots (n = 0)

Control sites (n = 10)

No data collected  
(n = 3)

No data submitted  
(n = 2)

Control sites with routinely  
collected data (n = 5)

**Types of data submitted:**

- Number of referrals (n = 4)
- Activity (n = 4)
- Waiting list data (n = 4)
- Number of lost slots (n = 3)
